# Supplementary material for: Multi-temperature X-ray diffraction, Mössbauer spectroscopy and magnetic susceptibility studies of a solvated mixed-valence trinuclear iron formate, [Fe3O(HCO2)6(NC5H4CH3)3]·1.3(NC5H4CH3)
Source: Royal Society of Chemistry journal article supplement (doi:10.1039/b202851d), 2002-01-01
Supplement: b202851d.doc [file b202851d.doc]

**Figure S1**. Temperature dependence of the Fe-Oe bonds to the equitorial carboxylate ligands. The bars above and below the bond values indicate 1 esd.

**Figure S2.** Temperature dependence of the Fe-N bond distances.
